RESEARCH ARTICLE

# Short-Term Fluctuations in Air Pollution and Asthma in Scania, Sweden. Is the Association Modified by Long-Term Concentrations?

Tahir Taj<sup>1\*</sup>, Emilie Stroh<sup>1</sup>, Daniel Oudin Åström<sup>2,3</sup>, Kristina Jakobsson<sup>1</sup>, Anna Oudin<sup>1,3</sup>

**1** Department of Occupational and Environmental Medicine, Lund University, Lund, Sweden, **2** Centre for Primary Health Care Research, Department of Clinical Science, Malmö, Lund University, Lund, Sweden, **3** Department of Occupational and Environmental Medicine, Umeå University, Umeå, Sweden

\* [tahir.taj@med.lu.se](mailto:tahir.taj@med.lu.se)

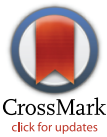

OPEN ACCESS

**Citation:** Taj T, Stroh E, Åström DO, Jakobsson K, Oudin A (2016) Short-Term Fluctuations in Air Pollution and Asthma in Scania, Sweden. Is the Association Modified by Long-Term Concentrations? PLoS ONE 11(11): e0166614. doi:10.1371/journal.pone.0166614

**Editor:** Alexander Larcombe, Telethon Institute for Child Health Research, AUSTRALIA

**Received:** June 7, 2016

**Accepted:** November 1, 2016

**Published:** November 18, 2016

**Copyright:** © 2016 Taj et al. This is an open access article distributed under the terms of the [Creative Commons Attribution License](https://creativecommons.org/licenses/by/4.0/), which permits unrestricted use, distribution, and reproduction in any medium, provided the original author and source are credited.

**Data Availability Statement:** Study data of both health out and air pollution is uploaded on Open Science Framework database and can be access using following reference. Taj, Tahir. 2016. "Asthma Study." Open Science Framework. October 6. [osf.io/kescv](https://osf.io/kescv).

**Funding:** The authors would like to thank FORMAS, The Swedish Research Council for Environment, Agricultural Sciences and Spatial Planning and the Faculty of Medicine, Lund University, Sweden for funding the research project. The funders had no role in study design, data collection and analysis,

## Abstract

### Background and aims

Asthma is one of the most common respiratory diseases in the world. Research has shown that temporal increases in air pollution concentrations can aggravate asthma symptoms. The aim of this study was to assess whether individuals living in areas with higher air pollution concentrations responded differently to short-term temporal exposure to air pollution than those living in lower air pollution areas.

### Method

The study was designed as a case-crossover study in Scania, Sweden. Outcome data was visits to primary health care clinics with asthma as the main complaint during the years 2007 to 2010. Nitrogen dioxide levels were obtained from 21 different air pollution monitoring stations. Short-term exposure was defined as the average concentration four days prior to the visit. Data was pooled for areas above and below a two-year average NO<sub>2</sub> concentration of 10 µg/m<sup>3</sup>, dispersion modelled with an emission database.

### Results

The short-term association between NO<sub>2</sub> and asthma visits seemed stronger in areas with NO<sub>2</sub> levels below 10 µg/m<sup>3</sup>, with an odds ratio (OR) of 1.15 (95% confidence interval (CI): 1.08–1.23) associated with a 10 µg/m<sup>3</sup> increase in NO<sub>2</sub> compared to areas above 10 µg/m<sup>3</sup> NO<sub>2</sub> levels, where corresponding OR of 1.09 (95% CI: 1.02–1.17). However, this difference was not statistically significant. (p = 0.13)

### Conclusions

The study provided some evidence, although not statistically significant, that short-term associations between air pollution and asthma may depend on background air pollution levels. However, we cannot rule out that the association is due to other spatially dependent factors in Scania. The study should be reproduced in other study areas.

decision to publish, or preparation of the manuscript.

**Competing Interests:** The authors have declared that no competing interests exist.

## Introduction

Asthma is one of the most common chronic diseases among adolescents and middle-aged adults, and has become a major public health problem worldwide over the last few decades [1]. The prevalence of asthma in Sweden has stabilized during the last few decades, but is still one of the main public health concerns [2]. In a large population-based study in Sweden, the prevalence of physician diagnosed asthma was 8.3%. Of these, 70% were actively using asthma medication for symptom control [3].

A recent multicentre European study has shown that people growing up in rural areas close to livestock had a significantly lower prevalence of asthma compared to those growing up in urban areas [4]. Studies from Africa [5] and South America [6] have also reported similar findings. The main explanation for this difference is likely to be that the evolution of the Western lifestyle has resulted in relatively limited exposure to infectious agents during childhood [7], which expedite atopy by affecting the overall array of commensals and pathogens [8]. Another major difference between urban and rural areas, in terms of asthma risk factors, are air pollution concentrations.

Associations between air pollution and asthma are fairly well studied; air pollutants trigger inflammatory response and can act as strong bronchoconstrictors, and thereby exacerbate asthma symptoms [9, 10]. Air pollution levels are associated with increased health care visits due to asthma [11], for both emergency care and hospital admission [11] as well as for anti-asthmatic prescription [12]. However, it is more uncertain whether long-term exposure to air pollution is a cause of incident asthma [13–17].

Studies combining short-term and long-term exposure to air pollution are almost entirely lacking. A combined short-term and long-term approach is necessary to investigate if the effect of exposure to elevated levels of air pollutants shortly before an episode of exacerbation of respiratory problems is also dependent on long-term (several years) exposure levels [18]. Indeed, it may be that the burden of asthma exacerbations attributable to air pollution relates not to the triggering per se, but to air pollution increasing the pool of subjects with chronic obstructive diseases [19]. There is therefore a need to understand vulnerability to short-time variations in pollutant levels with respect to long-term exposure levels. The aim of this study was to assess whether individuals living in areas with higher long-term air pollution levels respond differently to a short-term increase in air pollution concentrations than those living in areas with lower long-term air pollution concentrations. The study was performed in an area where pollution levels generally were below or at current air quality guideline levels.

## Methodology

### Study area and population

The study was performed in the county Scania, Sweden “Fig 1”. Scania is the southernmost county of Sweden and comprises 33 municipalities with a total population of about 1.25 million people. The population density is highest on the west coast, with its three main cities (Malmö, Helsingborg and Lund).

### Data

**Health care registry.** Primary health care data was obtained from the Scania health care register database. In Scania, health care registers, along with data relating to inpatient and emergency visits, also include records of primary health care visits.

Primary health care records from 2007 to 2010 were extracted from the main dataset using ICD 10 codes for asthma illness (J45 codes) and a Swedish translation of ICD 10 codes (J45-p).

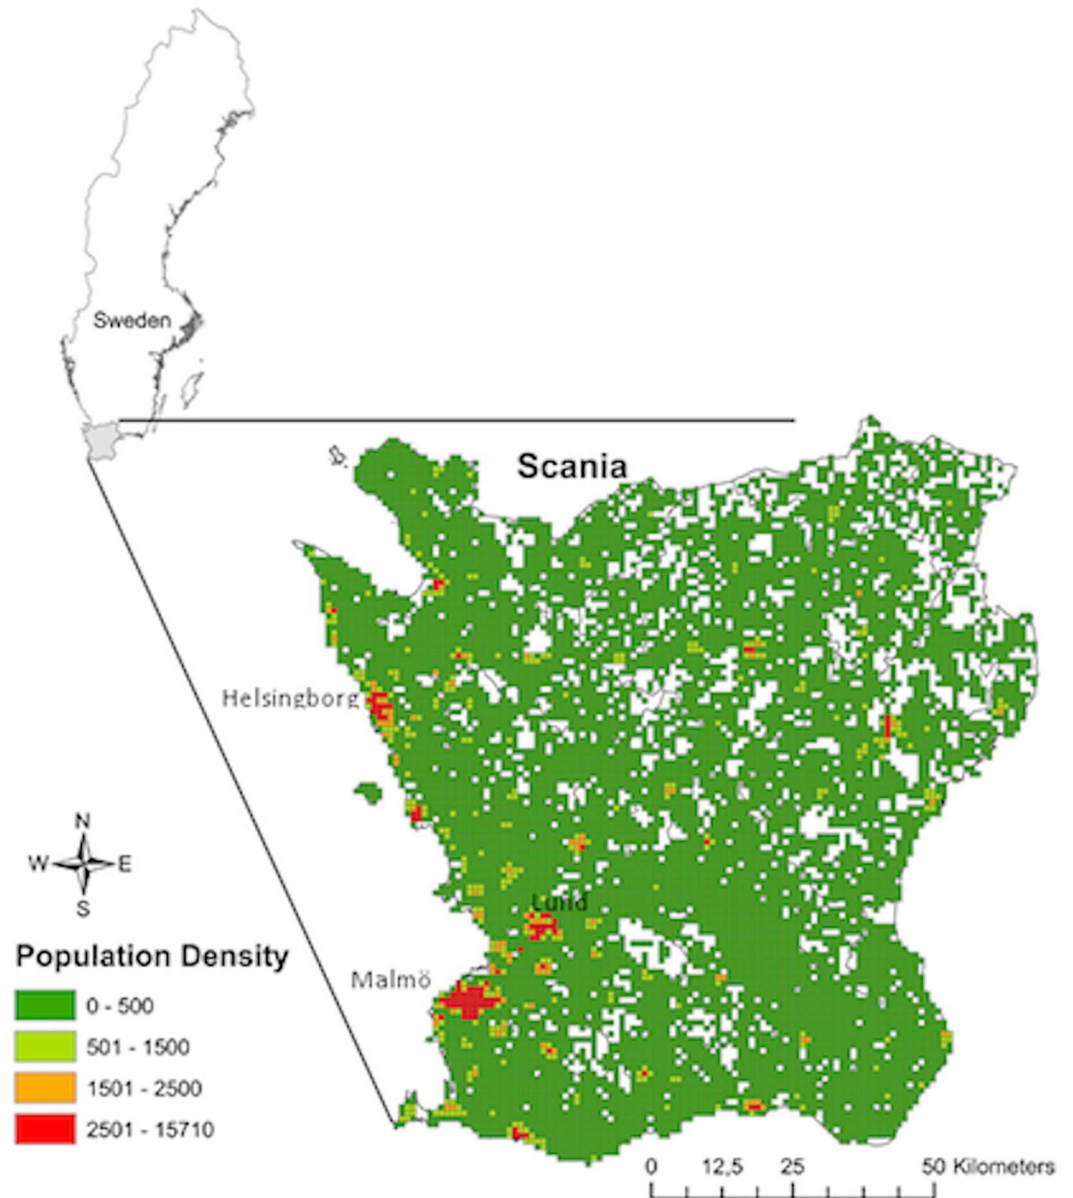

**Fig 1. Study area Scania population density map.**

doi:10.1371/journal.pone.0166614.g001

A total of 20,909 first asthma visits during the study period for individuals living in Scania were extracted for 123 primary health care centres (PHCCs). It is important to note that the outcome used was thus not necessarily the first ever asthma visit, but the first asthma visit during the study period.

There were nine PHCCs with fewer than 30 visits (a total of 267 visits) that were excluded from the analysis “Fig 2” due to lack of statistical power.

**Air pollution monitoring stations and dispersion model data.** For this study, nitrogen dioxide (NO<sub>2</sub>) was used as a proxy for air pollution exposure, as a number of studies have shown that NO<sub>2</sub> is a good indicator of traffic-related air pollution [20–22]. We had access to hourly values from 21 air pollution monitoring stations in different parts of Scania “Fig 3”. For

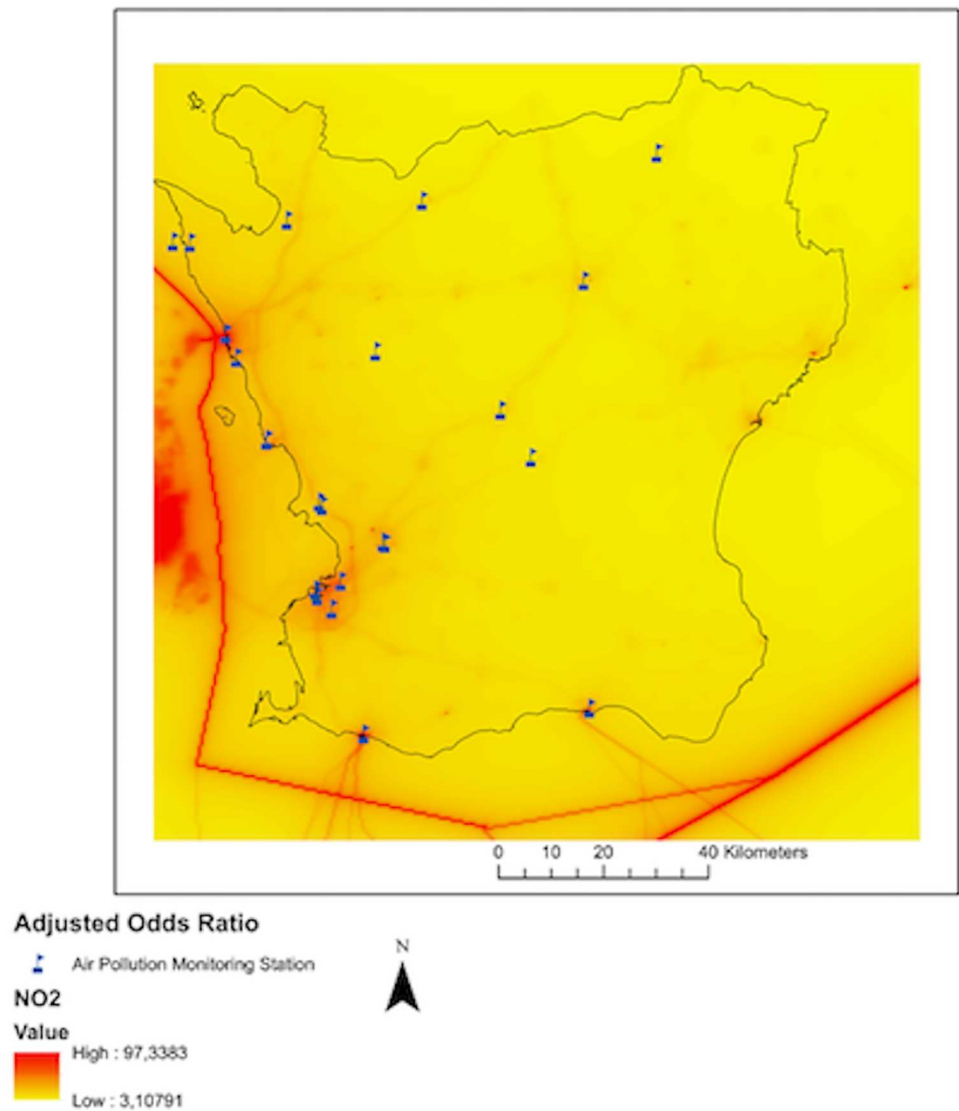

**Fig 2. Dispersion model NO<sub>2</sub> levels and sites of air pollution monitoring stations.**

doi:10.1371/journal.pone.0166614.g002

all monitoring stations, geographical coordinates were obtained. We used only data from urban background air pollution monitoring stations to assign short-term air pollution exposure.

NO<sub>2</sub> levels for each PHCC were assigned based on proximity to the air pollution monitoring station (ranked based on distance from the clinic). PHCCs with no air pollution station within a 20 km radius were excluded from the study (N = 22) (excluding 6,384 asthma visits). We defined the mean air pollution concentration for each PHCs as the (arithmetic) mean concentration for the exposure period for the closest air pollution monitor. We defined the global mean as the (arithmetic) mean concentration from all air pollution monitoring stations in Scania for the exposure time period.

Short-term air pollution exposure was defined as the average NO<sub>2</sub> level during the same day as the PHCC visit as well as three days prior to the visit. A GIS-based dispersion model

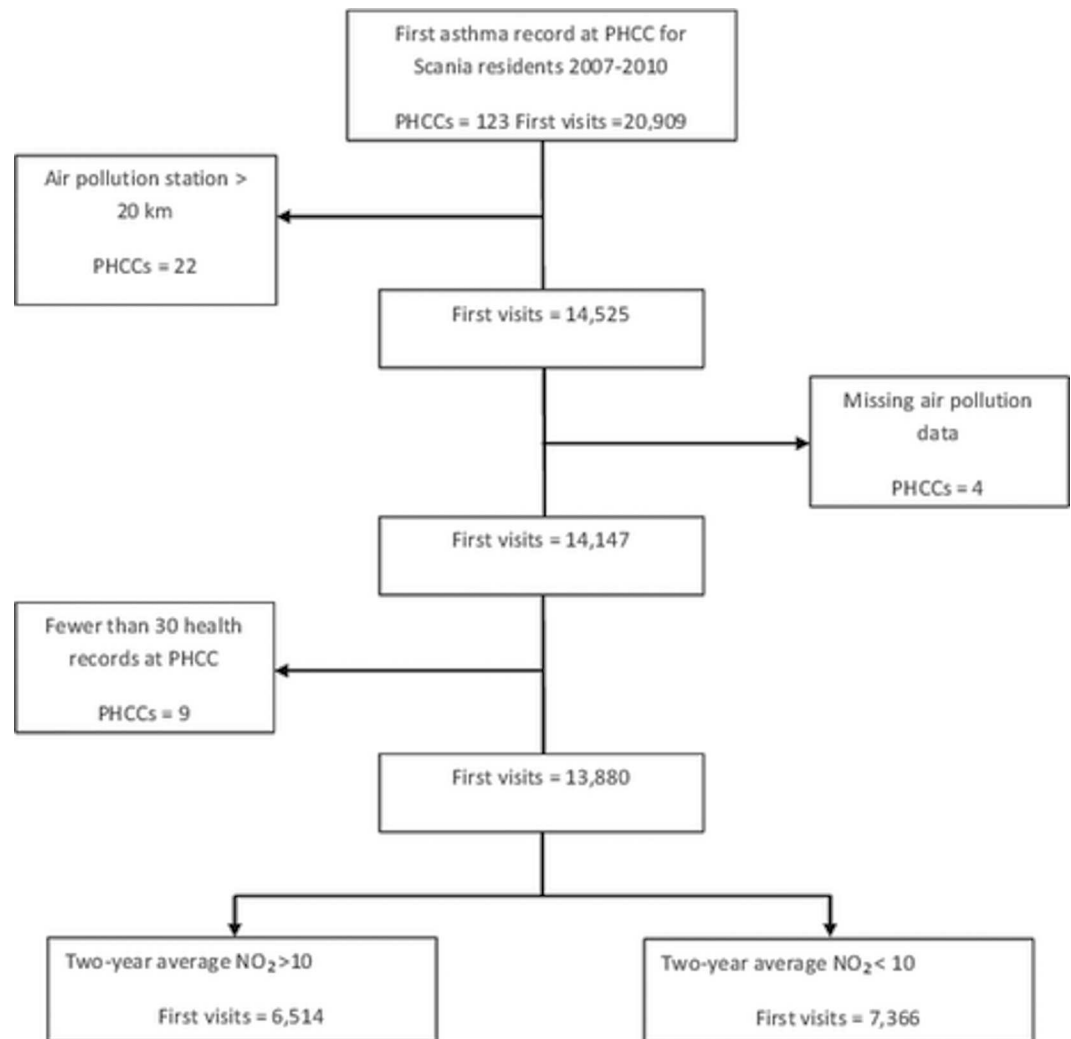

**Fig 3. Flow chart showing final sample selection steps.**

doi:10.1371/journal.pone.0166614.g003

together with an emission database was used to model long-term concentrations of NO<sub>2</sub> at the PHCC [23]. Long-term NO<sub>2</sub> exposure was defined as the average NO<sub>2</sub> level at the PHCC two years prior to the visit.

### Statistical analysis

**Study design.** A time stratified case-crossover study design was used [24]. This design is used extensively in environmental studies to analyse the short-term effects of environmental exposure such as air pollutants [25] and temperature [26, 27] on health. This study design compares the exposure prior to a health event with control periods that can be either prior to or after the event. The same individual acts as his or her own control within a short time span, which is why this design adjusts by design for non-time varying confounders at individual level such as gender, education and socioeconomic factors [28]. For each visit, four control periods matched by day of the week were calculated, two prior to the visit and two after, using the same air pollution monitoring station. The total number of first asthma visits selected for final analysis was 13,880 at 88 PHCCs. Detailed descriptions of first visit selection are explained in “Fig 2”.

Model 1 was unadjusted with only NO<sub>2</sub> as a covariate, model 2 was adjusted for temperature, Humidity and rainfall with smooth functions (natural cubic splines) with 3 degrees of freedom. PM<sub>10</sub> was additionally adjusted for in model 3, O<sub>3</sub> in model 4 and SO<sub>2</sub> in model 5. Model checks were performed using residual deviance, i.e. plotting residuals versus fitted values and checking R<sup>2</sup> and calculating AIC. Furthermore, sensitivity analysis was performed using the mean pollutant level for each PHCC instead of the global mean and when not excluding data based on number of visits and gender.

All PHCCs were grouped in to two categories of NO<sub>2</sub>, above and below 10 µg/m<sup>3</sup> using long term air pollution exposure i.e two year prior to visit. We also calculated a relative risk ratio between the exposure groups and evaluated the statistical significance of the derived Z-score and corresponding p-value [29].

PostgreSQL 9.1.3 relational database [30] was used for identifying the first asthma visit and calculating short- and long-term NO<sub>2</sub> levels for each visit. Data analyses were performed with R version 3.2[31].

### Ethics statement

Our request for primary health care data was granted after formal scrutiny at the Region Skånes Health Care Databases. In accordance with Swedish law and regulations, we did not seek permission at the Regional Ethical Board at Lund University, since the data granted to us had no personal identification numbers and very limited individual information. It was impossible to identify any individual from our data.

### Results

The total number of first asthma visits during the study period was 13,880 at 88 PHCC. The mean age of the patients was 46 years (SD: 24), and 7,161 (56.3%) were female. The mean daily first asthma visits for each PHCC ranged from 3 to 319. Descriptive data on daily weather and air pollution levels is given in Table 1.

Long-term NO<sub>2</sub> levels at PHCCs towards the west coast were higher compared to the east coast “Fig 3”. [In S1 Table and S2 Table, the correlations between pollutants and climate data are reported.] Tables 2 and 3 show pooled unadjusted and adjusted odds ratios for PHCC above and below 10NO<sub>2</sub> µg/m<sup>3</sup>.

Odds ratios for each PHCC are plotted in “Figs 4 and 5” and given in Table 4 and also in “S1 Fig and S2 Fig”. A pooled odds ratio adjusting for temperature, humidity, rainfall and other pollutants was calculated for PHCCs with long-term NO<sub>2</sub> levels above and below 10 µg/m<sup>3</sup>. Tables 2 and 3 show detailed steps of the model for pooled analysis. The pooled odds ratios for PHCCs

**Table 1. Descriptive data on daily weather, air pollution in Scania, Sweden, 2007–2010.**

| Variable                | Minimum | 25%  | Median | 75%  | Maximum | Mean ± SD   |
|-------------------------|---------|------|--------|------|---------|-------------|
| PM <sub>10</sub> µg/m3  | 4.1     | 12.7 | 15.6   | 19.8 | 46.4    | 16.7 ± 6.2  |
| PM <sub>2.5</sub> µg/m3 | 2.9     | 7.6  | 9.6    | 13.0 | 57.0    | 10.9 ± 5.5  |
| NO <sub>2</sub> µg/m3   | 0.7     | 9.7  | 14.4   | 19.2 | 60.6    | 14.3 ± 8.1  |
| O <sub>3</sub> µg/m3    | 20.7    | 46.3 | 55.9   | 65.1 | 93.2    | 55.3 ± 13.1 |
| SO <sub>2</sub> µg/m3   | 1.0     | 2.1  | 2.6    | 3.2  | 6.8     | 2.7 ± 0.9   |
| Temperature °C          | -7.0    | 4.0  | 8.3    | 14.1 | 25.3    | 8.8 ± 6.5   |
| Humidity %              | 46.1    | 67.4 | 76.0   | 82.3 | 94.0    | 74.2 ± 10.0 |
| Rain mm                 | 0.0     | 0.0  | 0.7    | 2.5  | 27.4    | 1.5 ± 2.8   |
| Asthma visits           | 1       | 9    | 13     | 17   | 38      | 13 ± 6.6    |

doi:10.1371/journal.pone.0166614.t001

**Table 2. Pooled odds ratios (ORs) for Asthma visit with their 95% confidence intervals (CIs) for areas with NO<sub>2</sub> below 10 µg/m<sup>3</sup>.**

|                                 | OR   | 95% CI    | P value |
|---------------------------------|------|-----------|---------|
| Model 1 NO <sub>2</sub> only    | 1.15 | 1.08–1.23 | <0.001  |
| Model 2 temp hum rainfall added | 1.15 | 1.08–1.23 | <0.001  |
| Model 3 PM <sub>10</sub> added  | 1.13 | 1.18–1.07 | <0.001  |
| Model 4 O <sub>3</sub> added    | 1.13 | 1.18–1.07 | <0.001  |
| Model 5 SO <sub>2</sub> added   | 1.12 | 1.17–1.07 | <0.001  |

Associations are shown as ORs and their 95% CIs for each pollutant

Model 1 effect of NO<sub>2</sub> without adjustment

Model 2 effect of NO<sub>2</sub> with adjustment temperature, humidity and rainfall

Model 3 effect of NO<sub>2</sub> with adjustment temperature, humidity, rainfall and PM<sub>10</sub>

Model 4 effect of NO<sub>2</sub> with adjustment temperature, humidity, rainfall, PM<sub>10</sub> and O<sub>3</sub>

Model 5 effect of NO<sub>2</sub> with adjustment temperature, humidity, rainfall, PM<sub>10</sub>, O<sub>3</sub> and SO<sub>2</sub>

doi:10.1371/journal.pone.0166614.t002

with long term lower NO<sub>2</sub> levels was 1.15 (95% confidence interval (CI): 1.08–1.23), whereas the pooled odds ratio for PHCCs with long term higher NO<sub>2</sub> levels was 1.09 (95% CI: 1.02–1.17). The difference between the pooled odds ratios was not statistically significant (p = 0.13).

## Discussion

There was an association between short term increased in air pollution concentration and daily asthma visits. The association seemed stronger in areas with a lower long-term air pollution concentration than in areas with higher concentration. It is important to note that the difference was not statistically significant, and that there are several possible explanations for our finding.

We are not aware of previous studies investigating if long-term air pollution levels may modify the short-term association between air pollution and asthma. Therefore, we are speculating that one explanation for our finding could be that people living in areas with higher long-term air pollution levels adaptation to some extent to exposure to air pollution. There could also be demographic differences between the populations above and below the cut-off

**Table 3. Pooled odds ratios (ORs) for Asthma visit with their 95% confidence intervals (CIs) for areas with NO<sub>2</sub> above 10 µg/m<sup>3</sup>.**

|                                 | Odds Ratio | 95% CI    | P value |
|---------------------------------|------------|-----------|---------|
| Model 1 NO <sub>2</sub> only    | 1.10       | 1.03–1.18 | <0.01   |
| Model 2 temp hum rainfall added | 1.09       | 1.02–1.15 | <0.01   |
| Model 3 PM <sub>10</sub> added  | 1.10       | 1.02–1.18 | <0.01   |
| Model 4 O <sub>3</sub> added    | 1.09       | 1.03–1.18 | <0.01   |
| Model 5 SO <sub>2</sub> added   | 1.09       | 1.02–1.17 | <0.01   |

Associations are shown as ORs and their 95% CIs for each pollutant.

Model 1 effect of NO<sub>2</sub> without adjustment

Model 2 effect of NO<sub>2</sub> with adjustment temperature, humidity and rainfall

Model 3 effect of NO<sub>2</sub> with adjustment temperature, humidity, rainfall and PM<sub>10</sub>

Model 4 effect of NO<sub>2</sub> with adjustment temperature, humidity, rainfall, PM<sub>10</sub> and O<sub>3</sub>

Model 5 effect of NO<sub>2</sub> with adjustment temperature, humidity, rainfall, PM<sub>10</sub>, O<sub>3</sub> and SO<sub>2</sub>

doi:10.1371/journal.pone.0166614.t003

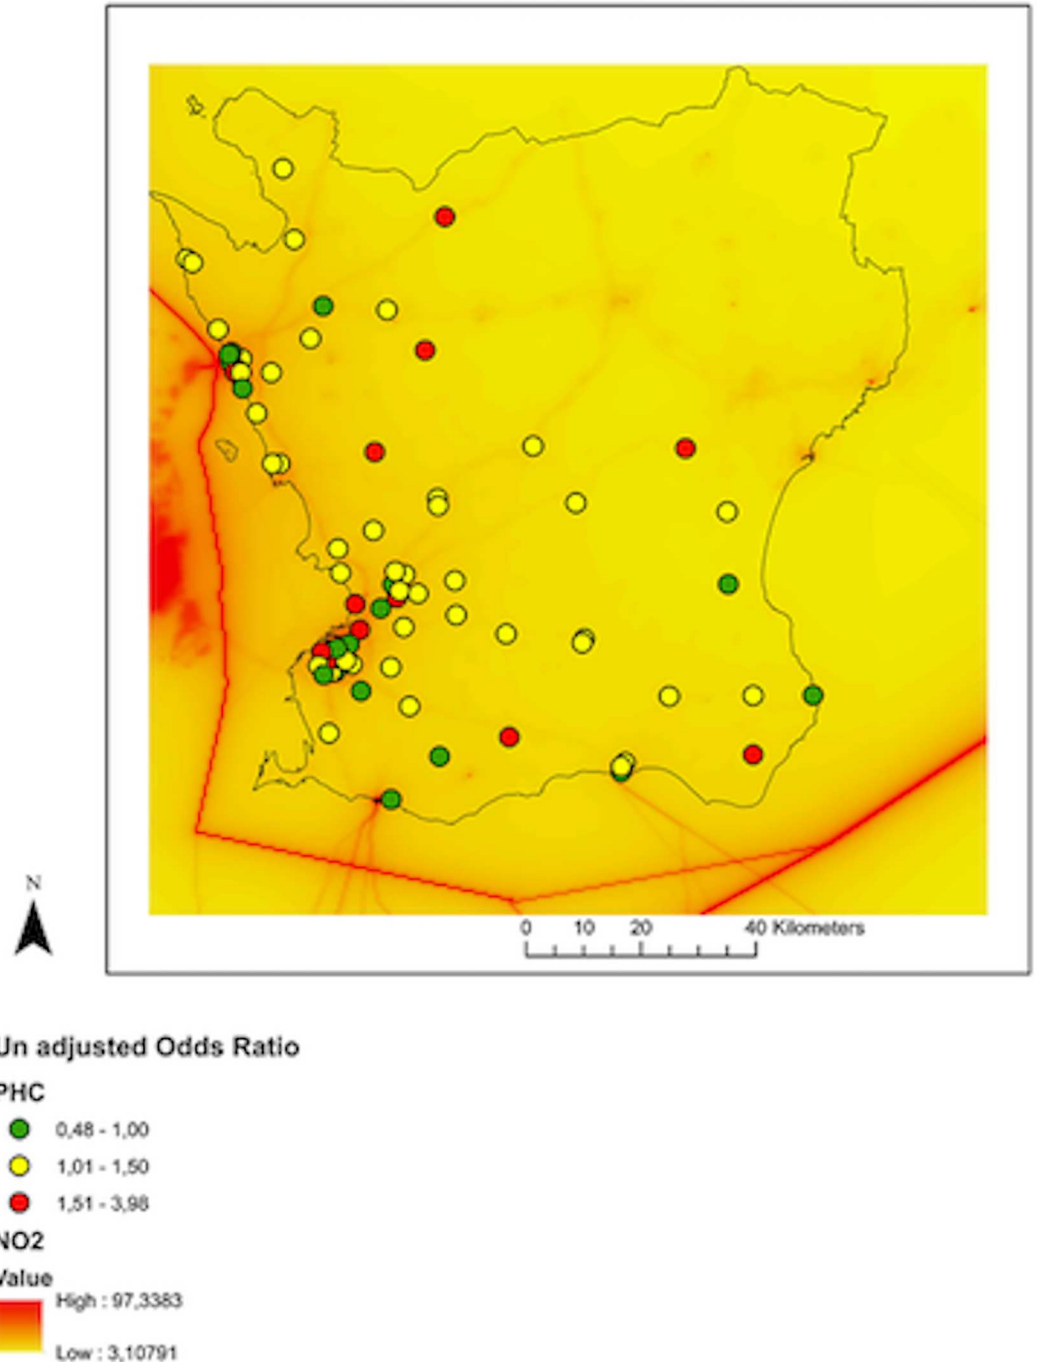

**Fig 4. Unadjusted odds ratio at PHCC level.**

doi:10.1371/journal.pone.0166614.g004

that drive the observed difference. Moreover, the difference we observed was not statistically significant. It would be of interest to carry out similar studies in different study settings.

There is plenty of evidence for air pollution to have acute adverse effects on respiratory symptoms, [32–34] especially in large urban areas where air pollution levels can be rather high, for example in Sao Paulo, Brazil, [35] Hong Kong, [36] Vancouver [37] and Toronto [38],



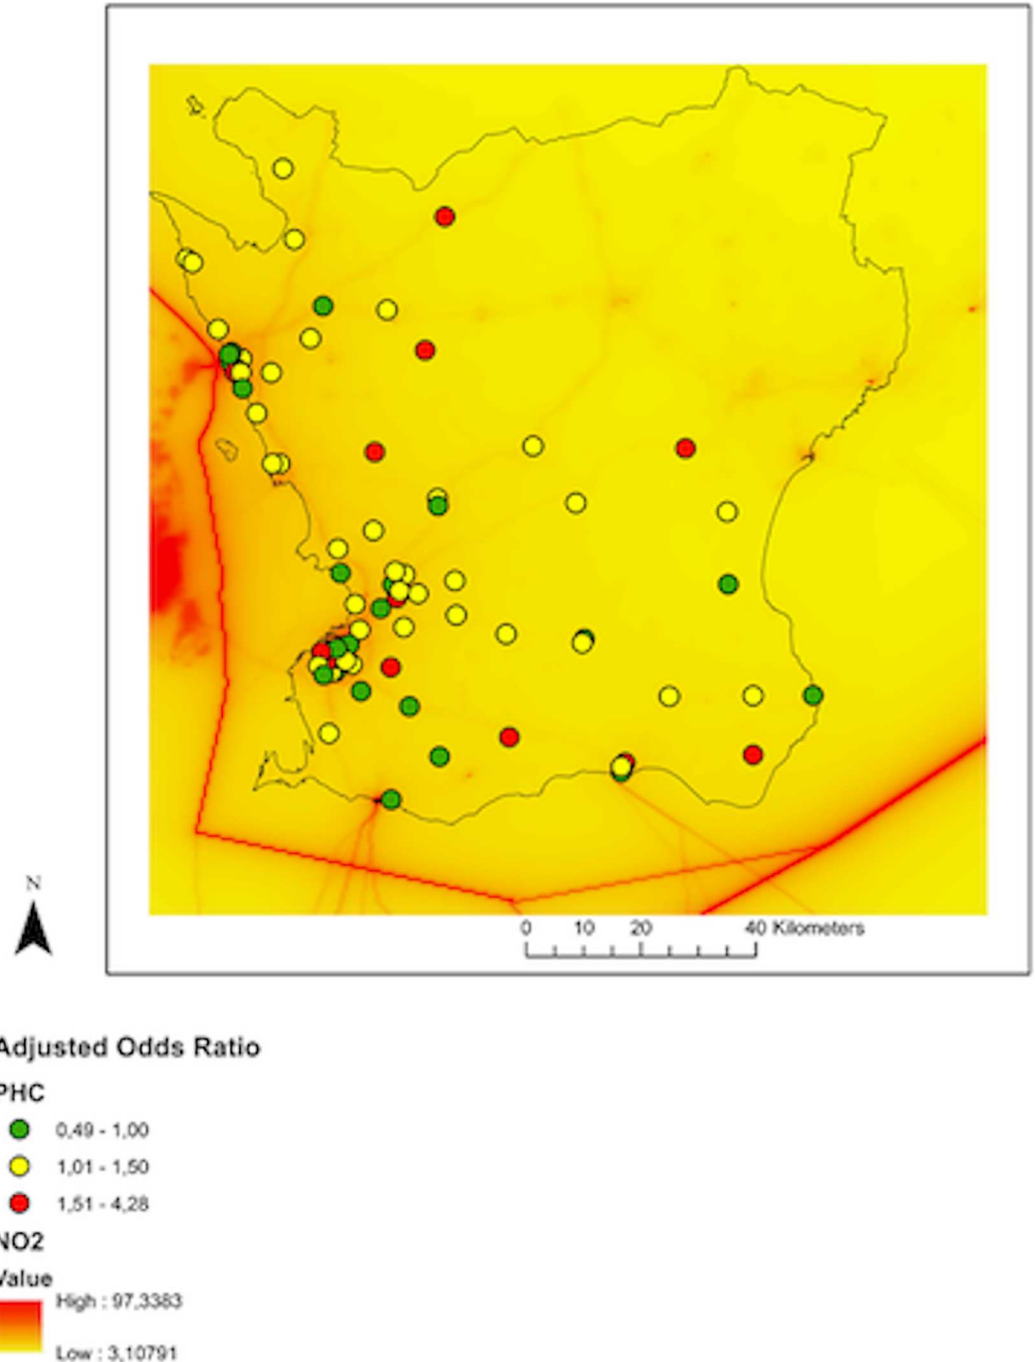

**Fig 5. Adjusted odds ratio at PHCC level.**

doi:10.1371/journal.pone.0166614.g005

Canada, inner-cities of USA[39] and Copenhagen, Denmark[40]. Effects on incident asthma is more uncertain. For example, a study by Gao Y et al. in 2014 [41] found that girls living in high pollution districts had higher rates of respiratory symptoms as well as an elevated risk of asthma. Another study conducted by Berhane K et al. in 2014 [42] reported a negative association between long-term NO<sub>2</sub> concentration among asthmatics and lung function; the same study also reported similar results with other criteria pollutants. However, a study conducted

**Table 4. Odds ratios (ORs)with 95% confidence intervals (CIs) for Asthma visits.**

| PHCC ID | Odds ratio | Lower limit | Upper limit |
|---------|------------|-------------|-------------|
| 12      | 0.89       | 0.64        | 1.23        |
| 17      | 1.03       | 0.69        | 1.53        |
| 25      | 1.20       | 0.74        | 1.94        |
| 27      | 0.86       | 0.51        | 1.48        |
| 32      | 1.15       | 0.56        | 2.37        |
| 34      | NA         | NA          | NA          |
| 40      | 0.7        | 0.47        | 1.05        |
| 41      | 1.64       | 0.77        | 3.51        |
| 44      | 0.49       | 0.21        | 1.14        |
| 46      | 0.97       | 0.51        | 1.85        |
| 50      | 2.02       | 0.85        | 4.81        |
| 51      | 1.11       | 0.58        | 2.13        |
| 53      | 0.99       | 0.47        | 2.06        |
| 54      | 1.03       | 0.43        | 2.51        |
| 55      | 0.91       | 0.64        | 1.29        |
| 63      | 1.50       | 1.01        | 2.22        |
| 64      | 0.98       | 0.60        | 1.60        |
| 65      | 1.28       | 0.95        | 1.74        |
| 66      | 1.12       | 0.80        | 1.57        |
| 67      | 1.42       | 0.99        | 2.04        |
| 68      | 1.01       | 0.64        | 1.58        |
| 69      | 1.36       | 0.78        | 2.37        |
| 70      | 1.33       | 0.99        | 1.78        |
| 71      | 0.75       | 0.51        | 1.12        |
| 72      | 1.08       | 0.69        | 1.68        |
| 73      | 1.25       | 0.77        | 2.03        |
| 74      | 1.59       | 1.06        | 2.36        |
| 75      | 1.16       | 0.86        | 1.58        |
| 76      | 1.33       | 0.97        | 1.82        |
| 78      | 1.25       | 0.79        | 1.98        |
| 79      | 1.67       | 1.16        | 2.39        |
| 80      | 1.31       | 0.86        | 1.99        |
| 81      | 1.02       | 0.71        | 1.48        |
| 82      | 1.06       | 0.72        | 1.56        |
| 83      | 1.20       | 0.91        | 1.55        |
| 84      | 1.00       | 0.74        | 1.35        |
| 85      | NA         |             |             |
| 87      | NA         |             |             |
| 90      | NA         |             |             |
| 91      | 1.10       | 0.61        | 2.01        |
| 92      | NA         |             |             |
| 93      | 3.62       | 0.75        | 17.41       |
| 96      | NA         |             |             |
| 97      | NA         |             |             |
| 98      | NA         |             |             |
| 99      | NA         |             |             |
| 103     | 0.80       | 0.47        | 1.36        |

(Continued)

**Table 4.** (Continued)

| PHCC ID | Odds ratio | Lower limit | Upper limit |
|---------|------------|-------------|-------------|
| 104     | 1.01       | 0.59        | 1.73        |
| 105     | 0.95       | 0.64        | 1.42        |
| 106     | 0.74       | 0.49        | 1.10        |
| 107     | 1.35       | 0.88        | 2.07        |
| 108     | 1.03       | 0.66        | 1.59        |
| 109     | 1.57       | 0.99        | 2.48        |
| 110     | 1.52       | 0.89        | 2.58        |
| 111     | 1.17       | 0.74        | 1.85        |
| 112     | 0.97       | 0.62        | 1.51        |
| 113     | 1.06       | 0.71        | 1.59        |
| 114     | 0.87       | 0.61        | 1.23        |
| 115     | 0.96       | 0.66        | 1.41        |
| 116     | 1.61       | 0.98        | 2.7         |
| 117     | 1.15       | 0.74        | 1.81        |
| 118     | 0.69       | 0.36        | 1.32        |
| 119     | 0.96       | 0.64        | 1.45        |
| 120     | 1.67       | 0.95        | 2.94        |
| 122     | 0.93       | 0.57        | 1.52        |
| 123     | 1.50       | 0.98        | 2.29        |
| 125     | 1.05       | 0.68        | 1.60        |
| 126     | 1.69       | 0.46        | 6.30        |
| 128     | 1.14       | 0.52        | 2.5         |
| 130     | 4.28       | 0.77        | 23.9        |
| 132     | 1.07       | 0.56        | 2.04        |
| 134     | 1.41       | 0.75        | 2.67        |
| 135     | 1.17       | 0.72        | 1.91        |
| 136     | 1.13       | 0.78        | 1.63        |
| 137     | 1.54       | 0.89        | 2.66        |
| 138     | 1.25       | 0.77        | 2.04        |
| 139     | 1.31       | 0.92        | 1.87        |
| 140     | 1.17       | 0.69        | 2.01        |
| 141     | 0.83       | 0.59        | 1.18        |
| 142     | 1.22       | 0.71        | 2.10        |
| 143     | 0.67       | 0.41        | 1.10        |
| 144     | 0.90       | 0.53        | 1.52        |
| 145     | 0.72       | 0.41        | 1.25        |
| 146     | 1.41       | 1.03        | 1.95        |
| 147     | 1.67       | 1.10        | 2.53        |
| 148     | 1.18       | 0.82        | 1.71        |
| 149     | 1.36       | 0.95        | 1.95        |
| 150     | 0.99       | 0.70        | 1.41        |

Model adjusted for climate variable, PM<sub>10</sub>, O<sub>3</sub> and SO<sub>2</sub>

doi:10.1371/journal.pone.0166614.t004

by Fuertes E et al. in 2013 [43] failed to find any association between living in high pollutant areas, i.e. expose to traffic-related air pollution, and risk of asthma. In a review by Jie Y et al. [44], the impact of geographical variation on asthma prevalence was studied. In this review they

particularly studied the difference in asthma between urban and rural areas. The researchers concluded that asthma symptoms occurred more frequently in urban areas compared to rural areas, and the main explanation they found in their review was a difference in environmental risk factors, with the urban population being more exposed to dust mites and high traffic-related air pollution levels, and that a Western lifestyle contributed to high levels of asthma symptoms [44].

A possible explanation to our finding could be that those who are more susceptible to asthma and other respiratory diseases tend to move away from urban areas, which perhaps partly could explain the discrepant results of studies on long-term air pollution and asthma. However, the findings from previous studies are not directly comparable with our present study since we used primary health care data, which is rather unique (air pollution studies often use cohort data or emergency and hospital admission data). Moreover, our setting is a generally low air pollution setting, unlike other studies. If the results of the present study would be repeated and corroborated by others, they are interesting in the context of understanding the link between air pollution and asthma, which is still only partly understood.

### Strengths and weaknesses

The study has several strengths and weaknesses that should be mentioned. First, we did not have access to participants' exact residential addresses or workplace addresses, which naturally is a source of exposure measurement error, and is always an issue in time series air pollution studies [45]. We know from previous studies that measured exposure is not even highly correlated with modelled exposure at home [23] for certain. However, when we studied the study subjects' residential address and where they seek health care, we found that more than 99% of the individuals visited a PHCC in the same municipality where they were registered as being resident "S3 Table–S8 Table". We also studied the change in residential address for our study participants over the study period, and we found that 90% of the participants had not changed their residence over the entire study period; 1,64% had a residential address different from the PHCC commune they visited, 3,52% had a residential address different from the PHCC commune one year prior to the visit and 4,54% had a residential address different from the PHCC commune they visited two years prior to visit. Detailed yearly statistics are given in "S9 Table". This indicates that exposure misclassification caused by the fact that patients seek healthcare outside their residential municipality is rather limited.

One strength of this study is that air pollution exposure was assigned using 21 air pollution monitoring stations spread across the county "Fig 2". To improve exposure assessment, all PHCCs with no air pollution monitoring station within the nearest 20 km were excluded from the study, which reduced the total number of PHCCs analysed in the final model but probably added accuracy to the exposure assessment. Another strength of the study is the utilization of modelled NO<sub>2</sub> data for accessing long-term air pollution exposure. The model used has been validated in a prior study [46]. However, we did not have enough information to conduct enough sensitivity analyses to rule out the possibility that our findings could be due to underlying differences in, for example, demographic differences between populations below and above the cut-off background air pollution concentrations. The main strength of the study is the rather unique outcome data, where we were able to use primary health care data on a large scale. Sweden is one of very few countries where primary health care data registers exist and are well organized. Use of PHCC data provides a rare opportunity to study the effects of air pollution on health care visits, which are very different to emergency and inpatient visits. Primary health care is usually the very first health care contact in the disease process. It may therefore be more accurate in associating exposure with disease outcome as it also reflects the initiation of the disease process.

## Conclusion

Our results may suggest that short-term associations between daily fluctuations in air pollution concentrations and primary health care visits for asthma differ depending on background air pollution levels. Further research is needed that explain relationship between air pollution and other spatially determinant covariates for asthma.

## Supporting Information

**S1 Fig. Unadjusted odds ratio at PHCC level.**

(DOCX)

**S2 Fig. Adjusted odds ratio at PHCC level.**

(DOCX)

**S1 Table. Correlation coefficients among concentration of air pollutants in areas with NO<sub>2</sub> above 10 µg/m<sup>3</sup>.**

(DOCX)

**S2 Table. Correlation coefficients among concentration of air pollutants in areas with NO<sub>2</sub> below 10 µg/m<sup>3</sup>.**

(DOCX)

**S3 Table. Yearly visits and percentage of visit outside residential commune same year one year and two year prior to health visits for study Participants.**

(DOCX)

**S4 Table. Commune wise health care visits and percentage of visit outside residential commune for Year 2005.**

(DOCX)

**S5 Table. Commune wise health care visits and percentage of visit outside residential commune for Year 2006.**

(DOCX)

**S6 Table. Commune wise health care visits and percentage of visit outside residential commune for Year 2007.**

(DOCX)

**S7 Table. Commune wise health care visits and percentage of visit outside residential commune for Year 2008.**

(DOCX)

**S8 Table. Commune wise health care visits and percentage of visit outside residential commune for Year 2009.**

(DOCX)

**S9 Table. Commune wise health care visits and percentage of visit outside residential.**

(DOCX)

## Author Contributions

**Conceptualization:** KJ.

**Data curation:** TT.

**Formal analysis:** TT.

**Funding acquisition:** KJ.

**Investigation:** TT.

**Methodology:** TT AO DOÅ.

**Project administration:** KJ.

**Resources:** KJ.

**Software:** TT.

**Supervision:** AO.

**Validation:** DOÅ.

**Visualization:** TT.

**Writing – original draft:** TT.

**Writing – review & editing:** AO ES DOÅ KJ.

## References

1. Asthma NG. Asthma may affect as many as 334 million people 2014.
2. (AAIR) CfAAIR. ASTHMA IN THE EU TOWARDS BETTER MANAGEMENT AND REGULATION OF A PUBLIC HEALTH ISSUE JØRGEN MORTENSEN & ANDREA RENDA CEPS SPECIAL REPORT 2007. Available from: <https://www.ceps.eu/>.
3. Lotvall J, Ekerljung L, Ronmark EP, Wennergren G, Linden A, Ronmark E, et al. West Sweden Asthma Study: prevalence trends over the last 18 years argues no recent increase in asthma. *Respiratory research*. 2009; 10:94. doi: [10.1186/1465-9921-10-94](https://doi.org/10.1186/1465-9921-10-94) PMID: [19821983](https://pubmed.ncbi.nlm.nih.gov/19821983/); PubMed Central PMCID: [PMC2772988](https://pubmed.ncbi.nlm.nih.gov/PMC2772988/).
4. Timm S, Frydenberg M, Janson C, Campbell B, Forsberg B, Gislason T, et al. The Urban-Rural Gradient in Asthma: A Population-Based Study in Northern Europe. *International journal of environmental research and public health*. 2016; 13(1). doi: [10.3390/ijerph13010093](https://doi.org/10.3390/ijerph13010093) PMID: [26729146](https://pubmed.ncbi.nlm.nih.gov/26729146/); PubMed Central PMCID: [PMC4730484](https://pubmed.ncbi.nlm.nih.gov/PMC4730484/).
5. Herrant M, Loucoubar C, Boufkhed S, Bassene H, Sarr FD, Baril L, et al. Risk factors associated with asthma, atopic dermatitis and rhinoconjunctivitis in a rural Senegalese cohort. *Allergy, asthma, and clinical immunology: official journal of the Canadian Society of Allergy and Clinical Immunology*. 2015; 11(1):24. doi: [10.1186/s13223-015-0090-0](https://doi.org/10.1186/s13223-015-0090-0) PMID: [26306096](https://pubmed.ncbi.nlm.nih.gov/26306096/); PubMed Central PMCID: [PMC4547418](https://pubmed.ncbi.nlm.nih.gov/PMC4547418/).
6. Gaviola C, Miele CH, Wise RA, Gilman RH, Jaganath D, Miranda JJ, et al. Urbanisation but not biomass fuel smoke exposure is associated with asthma prevalence in four resource-limited settings. *Thorax*. 2016; 71(2):154–60. doi: [10.1136/thoraxjnl-2015-207584](https://doi.org/10.1136/thoraxjnl-2015-207584) PMID: [26699762](https://pubmed.ncbi.nlm.nih.gov/26699762/).
7. Bloomfield SF, Stanwell-Smith R, Crevel RW, Pickup J. Too clean, or not too clean: the hygiene hypothesis and home hygiene. *Clinical and experimental allergy: journal of the British Society for Allergy and Clinical Immunology*. 2006; 36(4):402–25. doi: [10.1111/j.1365-2222.2006.02463.x](https://doi.org/10.1111/j.1365-2222.2006.02463.x) PMID: [16630145](https://pubmed.ncbi.nlm.nih.gov/16630145/); PubMed Central PMCID: [PMC1448690](https://pubmed.ncbi.nlm.nih.gov/PMC1448690/).
8. Chanel O, Perez L, Kunzli N, Medina S, Aphekom g. The hidden economic burden of air pollution-related morbidity: evidence from the Aphekom project. *Eur J Health Econ*. 2015. doi: [10.1007/s10198-015-0748-z](https://doi.org/10.1007/s10198-015-0748-z) PMID: [26649740](https://pubmed.ncbi.nlm.nih.gov/26649740/).
9. Koren HS. Associations between criteria air pollutants and asthma. *Environmental health perspectives*. 1995; 103 Suppl 6:235–42. PMID: [8549479](https://pubmed.ncbi.nlm.nih.gov/8549479/); PubMed Central PMCID: [PMC1518942](https://pubmed.ncbi.nlm.nih.gov/PMC1518942/).
10. Trenga CA, Koenig JQ, Williams PV. Dietary antioxidants and ozone-induced bronchial hyperresponsiveness in adults with asthma. *Archives of environmental health*. 2001; 56(3):242–9. doi: [10.1080/00039890109604448](https://doi.org/10.1080/00039890109604448) PMID: [11480500](https://pubmed.ncbi.nlm.nih.gov/11480500/).
11. Bates DV. Observations on asthma. *Environmental health perspectives*. 1995; 103 Suppl 6:243–7. PMID: [8549480](https://pubmed.ncbi.nlm.nih.gov/8549480/); PubMed Central PMCID: [PMC1518912](https://pubmed.ncbi.nlm.nih.gov/PMC1518912/).
12. Menichini F, Mudu P. Drug consumption and air pollution: an overview. *Pharmacoepidemiology and drug safety*. 2010; 19(12):1300–15. doi: [10.1002/pds.2033](https://doi.org/10.1002/pds.2033) PMID: [20927798](https://pubmed.ncbi.nlm.nih.gov/20927798/).

13. Atkinson RW, Butland BK, Dimitroulopoulou C, Heal MR, Stedman JR, Carslaw N, et al. Long-term exposure to ambient ozone and mortality: a quantitative systematic review and meta-analysis of evidence from cohort studies. *BMJ open*. 2016; 6(2):e009493. doi: [10.1136/bmjopen-2015-009493](https://doi.org/10.1136/bmjopen-2015-009493) PMID: [26908518](https://pubmed.ncbi.nlm.nih.gov/26908518/); PubMed Central PMCID: PMC4769417.
14. Hansell A, Ghosh RE, Blangiardo M, Perkins C, Vienneau D, Goffe K, et al. Historic air pollution exposure and long-term mortality risks in England and Wales: prospective longitudinal cohort study. *Thorax*. 2016; 71(4):330–8. doi: [10.1136/thoraxjnl-2015-207111](https://doi.org/10.1136/thoraxjnl-2015-207111) PMID: [26856365](https://pubmed.ncbi.nlm.nih.gov/26856365/).
15. Ware LB, Zhao Z, Koyama T, May AK, Matthay MA, Lurmann FW, et al. Long-Term Ozone Exposure Increases the Risk of Developing the Acute Respiratory Distress Syndrome. *American journal of respiratory and critical care medicine*. 2015. doi: [10.1164/rccm.201507-1418OC](https://doi.org/10.1164/rccm.201507-1418OC) PMID: [26681363](https://pubmed.ncbi.nlm.nih.gov/26681363/).
16. Graham R. What is pityriasis rosea? *Practitioner*. 1989; 233(1467):555. PMID: [2532327](https://pubmed.ncbi.nlm.nih.gov/2532327/).
17. Bowatte G, Lodge C, Lowe AJ, Erbas B, Perret J, Abramson MJ, et al. The influence of childhood traffic-related air pollution exposure on asthma, allergy and sensitization: a systematic review and a meta-analysis of birth cohort studies. *Allergy*. 2015; 70(3):245–56. doi: [10.1111/all.12561](https://doi.org/10.1111/all.12561) PMID: [25495759](https://pubmed.ncbi.nlm.nih.gov/25495759/).
18. Kunzli N. Is air pollution of the 20th century a cause of current asthma hospitalisations? *Thorax*. 2012; 67(1):2–3. doi: [10.1136/thoraxjnl-2011-200919](https://doi.org/10.1136/thoraxjnl-2011-200919) PMID: [21979143](https://pubmed.ncbi.nlm.nih.gov/21979143/).
19. Kunzli N, Perez L, Lurmann F, Hricko A, Penfold B, McConnell R. An attributable risk model for exposures assumed to cause both chronic disease and its exacerbations. *Epidemiology*. 2008; 19(2):179–85. doi: [10.1097/EDE.0b013e3181633c2f](https://doi.org/10.1097/EDE.0b013e3181633c2f) PMID: [18300713](https://pubmed.ncbi.nlm.nih.gov/18300713/).
20. Baxter LK, Clougherty JE, Paciorek CJ, Wright RJ, Levy JI. Predicting residential indoor concentrations of nitrogen dioxide, fine particulate matter, and elemental carbon using questionnaire and geographic information system based data. *Atmospheric environment*. 2007; 41(31):6561–71. doi: [10.1016/j.atmosenv.2007.04.027](https://doi.org/10.1016/j.atmosenv.2007.04.027) PMID: [19830252](https://pubmed.ncbi.nlm.nih.gov/19830252/); PubMed Central PMCID: PMC2760735.
21. Sommar JN, Ek A, Middelveld R, Bjerg A, Dahlen SE, Janson C, et al. Quality of life in relation to the traffic pollution indicators NO<sub>2</sub> and NO<sub>x</sub>: results from the Swedish GA(2)LEN survey. *BMJ open respiratory research*. 2014; 1(1):e000039. doi: [10.1136/bmjresp-2014-000039](https://doi.org/10.1136/bmjresp-2014-000039) PMID: [25478186](https://pubmed.ncbi.nlm.nih.gov/25478186/); PubMed Central PMCID: PMC4212716.
22. Levy I, Mihele C, Lu G, Narayan J, Brook JR. Evaluating multipollutant exposure and urban air quality: pollutant interrelationships, neighborhood variability, and nitrogen dioxide as a proxy pollutant. *Environmental health perspectives*. 2014; 122(1):65–72. doi: [10.1289/ehp.1306518](https://doi.org/10.1289/ehp.1306518) PMID: [24225648](https://pubmed.ncbi.nlm.nih.gov/24225648/); PubMed Central PMCID: PMC3888565.
23. Stroh E, Rittner R, Oudin A, Ardo J, Jakobsson K, Bjork J, et al. Measured and modeled personal and environmental NO<sub>2</sub> exposure. *Population health metrics*. 2012; 10(1):10. doi: [10.1186/1478-7954-10-10](https://doi.org/10.1186/1478-7954-10-10) PMID: [22681784](https://pubmed.ncbi.nlm.nih.gov/22681784/); PubMed Central PMCID: PMC3463478.
24. Maclure M. The case-crossover design: a method for studying transient effects on the risk of acute events. *Am J Epidemiol*. 1991; 133(2):144–53. PMID: [1985444](https://pubmed.ncbi.nlm.nih.gov/1985444/).
25. Wichmann J, Folke F, Torp-Pedersen C, Lippert F, Ketzel M, Ellermann T, et al. Out-of-hospital cardiac arrests and outdoor air pollution exposure in Copenhagen, Denmark. *PloS one*. 2013; 8(1):e53684. doi: [10.1371/journal.pone.0053684](https://doi.org/10.1371/journal.pone.0053684) PMID: [23341975](https://pubmed.ncbi.nlm.nih.gov/23341975/); PubMed Central PMCID: PMC3544842.
26. Wichmann J, Ketzel M, Ellermann T, Loft S. Apparent temperature and acute myocardial infarction hospital admissions in Copenhagen, Denmark: a case-crossover study. *Environmental health: a global access science source*. 2012; 11:19. doi: [10.1186/1476-069X-11-19](https://doi.org/10.1186/1476-069X-11-19) PMID: [22463704](https://pubmed.ncbi.nlm.nih.gov/22463704/); PubMed Central PMCID: PMC3353865.
27. Wichmann J, Andersen ZJ, Ketzel M, Ellermann T, Loft S. Apparent temperature and cause-specific mortality in Copenhagen, Denmark: a case-crossover analysis. *International journal of environmental research and public health*. 2011; 8(9):3712–27. doi: [10.3390/ijerph8093712](https://doi.org/10.3390/ijerph8093712) PMID: [22016711](https://pubmed.ncbi.nlm.nih.gov/22016711/); PubMed Central PMCID: PMC3194112.
28. Carracedo-Martinez E, Taracido M, Tobias A, Saez M, Figueiras A. Case-crossover analysis of air pollution health effects: a systematic review of methodology and application. *Environmental health perspectives*. 2010; 118(8):1173–82. doi: [10.1289/ehp.0901485](https://doi.org/10.1289/ehp.0901485) PMID: [20356818](https://pubmed.ncbi.nlm.nih.gov/20356818/); PubMed Central PMCID: PMC2920078.
29. Altman DG, Bland JM. Interaction revisited: the difference between two estimates. *Bmj*. 2003; 326(7382):219. PMID: [12543843](https://pubmed.ncbi.nlm.nih.gov/12543843/); PubMed Central PMCID: PMC1125071.
30. Group TPGD. 2016. Available from: <http://www.postgresql.org/>.
31. Boriani S, Torricelli P, Ruggieri P, Biagini R. [Value and limitations of computerized axial tomography in the diagnostic study of synovial sarcoma (study of 13 case reports)]. *La Chirurgia degli organi di movimento*. 1985; 70(2):149–56. PMID: [2998707](https://pubmed.ncbi.nlm.nih.gov/2998707/).

32. Zhang S, Li G, Tian L, Guo Q, Pan X. Short-term exposure to air pollution and morbidity of COPD and asthma in East Asian area: A systematic review and meta-analysis. *Environ Res.* 2016; 148:15–23. doi: [10.1016/j.envres.2016.03.008](https://doi.org/10.1016/j.envres.2016.03.008) PMID: [26995350](https://pubmed.ncbi.nlm.nih.gov/26995350/).
33. Weichenthal SA, Lavigne E, Evans GJ, Godri Pollitt KJ, Burnett RT. PM and Emergency Room Visits for Respiratory Illness: Effect Modification by Oxidative Potential. *Am J Respir Crit Care Med.* 2016. doi: [10.1164/rccm.201512-2434OC](https://doi.org/10.1164/rccm.201512-2434OC) PMID: [26963193](https://pubmed.ncbi.nlm.nih.gov/26963193/).
34. Arbex MA, Santos Ude P, Martins LC, Saldiva PH, Pereira LA, Braga AL. Air pollution and the respiratory system. *J Bras Pneumol.* 2012; 38(5):643–55. PMID: [23147058](https://pubmed.ncbi.nlm.nih.gov/23147058/).
35. Braga ALF, Saldiva PHN, Pereira LAA, Menezes JJC, Conceição GMS, Lin CA, et al. Health effects of air pollution exposure on children and adolescents in São Paulo, Brazil\*†. *Pediatric Pulmonology.* 2001; 31(2):106–13. doi: [10.1002/1099-0496\(200102\)31:2<106::aid-ppul1017>3.0.co;2-m](https://doi.org/10.1002/1099-0496(200102)31:2<106::aid-ppul1017>3.0.co;2-m) PMID: [11180685](https://pubmed.ncbi.nlm.nih.gov/11180685/)
36. Wong GWK, Ko FWS, Lau TS, Li ST, Hui D, Pang SW, et al. Temporal relationship between air pollution and hospital admissions for asthmatic children in Hong Kong. *Clinical & Experimental Allergy.* 2001; 31(4):565–9. doi: [10.1046/j.1365-2222.2001.01063.x](https://doi.org/10.1046/j.1365-2222.2001.01063.x)
37. Yang Q, Chen Y, Shi Y, Burnett RT, McGrail KM, Krewski D. Association Between Ozone and Respiratory Admissions Among Children and the Elderly in Vancouver, Canada. *Inhalation Toxicology.* 2003; 15(13):1297–308. doi: [10.1080/08958370390241768](https://doi.org/10.1080/08958370390241768) PMID: [14569494](https://pubmed.ncbi.nlm.nih.gov/14569494/)
38. Burnett RT, Smith-Doiron M, Stieb D, Raizenne ME, Brook JR, Dales RE, et al. Association between Ozone and Hospitalization for Acute Respiratory Diseases in Children Less than 2 Years of Age. *American Journal of Epidemiology.* 2001; 153(5):444–52. doi: [10.1093/aje/153.5.444](https://doi.org/10.1093/aje/153.5.444) PMID: [11226976](https://pubmed.ncbi.nlm.nih.gov/11226976/)
39. O'Connor GT, Neas L, Vaughn B, Kattan M, Mitchell H, Crain EF, et al. Acute respiratory health effects of air pollution on children with asthma in US inner cities. *Journal of Allergy and Clinical Immunology.* 2008; 121(5):1133–9.e1. doi: [10.1016/j.jaci.2008.02.020](https://doi.org/10.1016/j.jaci.2008.02.020) PMID: [18405952](https://pubmed.ncbi.nlm.nih.gov/18405952/)
40. Andersen ZJ, Wahlin P, Raaschou-Nielsen O, Kettel M, Scheike T, Loft S. Size distribution and total number concentration of ultrafine and accumulation mode particles and hospital admissions in children and the elderly in Copenhagen, Denmark. *Occupational and Environmental Medicine.* 2008; 65(7):458–66. doi: [10.1136/oem.2007.033290](https://doi.org/10.1136/oem.2007.033290) PMID: [17989204](https://pubmed.ncbi.nlm.nih.gov/17989204/)
41. Gao Y, Chan EY, Li L, Lau PW, Wong TW. Chronic effects of ambient air pollution on respiratory morbidities among Chinese children: a cross-sectional study in Hong Kong. *BMC Public Health.* 2014; 14:105. doi: [10.1186/1471-2458-14-105](https://doi.org/10.1186/1471-2458-14-105) PMID: [24484614](https://pubmed.ncbi.nlm.nih.gov/24484614/); PubMed Central PMCID: [PMC3914361](https://pubmed.ncbi.nlm.nih.gov/PMC3914361/).
42. Berhane K, Zhang Y, Salam MT, Eckel SP, Linn WS, Rappaport EB, et al. Longitudinal effects of air pollution on exhaled nitric oxide: the Children's Health Study. *Occupational and environmental medicine.* 2014; 71(7):507–13. doi: [10.1136/oemed-2013-101874](https://doi.org/10.1136/oemed-2013-101874) PMID: [24696513](https://pubmed.ncbi.nlm.nih.gov/24696513/); PubMed Central PMCID: [PMC3910696](https://pubmed.ncbi.nlm.nih.gov/PMC3910696/).
43. Fuertes E, Standl M, Cyrus J, Berdel D, von Berg A, Bauer CP, et al. A longitudinal analysis of associations between traffic-related air pollution with asthma, allergies and sensitization in the GINIplus and LISApplus birth cohorts. *PeerJ.* 2013; 1:e193. doi: [10.7717/peerj.193](https://doi.org/10.7717/peerj.193) PMID: [24255809](https://pubmed.ncbi.nlm.nih.gov/24255809/); PubMed Central PMCID: [PMC3828611](https://pubmed.ncbi.nlm.nih.gov/PMC3828611/).
44. Jie Y, Isa ZM, Jie X, Ju ZL, Ismail NH. Urban vs. rural factors that affect adult asthma. *Rev Environ Contam Toxicol.* 2013; 226:33–63. doi: [10.1007/978-1-4614-6898-1\\_2](https://doi.org/10.1007/978-1-4614-6898-1_2) PMID: [23625129](https://pubmed.ncbi.nlm.nih.gov/23625129/).
45. Zeger SL, Thomas D, Dominici F, Samet JM, Schwartz J, Dockery D, et al. Exposure measurement error in time-series studies of air pollution: concepts and consequences. *Environ Health Perspect.* 2000; 108(5):419–26. PMID: [10811568](https://pubmed.ncbi.nlm.nih.gov/10811568/); PubMed Central PMCID: [PMC1638034](https://pubmed.ncbi.nlm.nih.gov/PMC1638034/).
46. Oudin A, Stroh E, Stromberg U, Jakobsson K, Bjork J. Long-term exposure to air pollution and hospital admissions for ischemic stroke. A register-based case-control study using modelled NO(x) as exposure proxy. *BMC Public Health.* 2009; 9:301. doi: [10.1186/1471-2458-9-301](https://doi.org/10.1186/1471-2458-9-301) PMID: [19691845](https://pubmed.ncbi.nlm.nih.gov/19691845/); PubMed Central PMCID: [PMC2736944](https://pubmed.ncbi.nlm.nih.gov/PMC2736944/).
